# Supplementary material for: Facile synthesis of flower-like CoMn2O4 microspheres for electrochemical supercapacitors
Source: Royal Society of Chemistry journal article supplement (doi:10.1039/c5ra02663f), 2015-01-01
Supplement: c5ra02663f1.pdf [file c5ra02663f1.pdf]

## Electronic Supplementary Information

# Facile synthesis of flower-like $\text{CoMn}_2\text{O}_4$ microspheres for electrochemical supercapacitors

Long Ren<sup>1</sup>, Jun Chen<sup>1</sup>, Xiaoqing Wang<sup>2</sup>, Mingjia Zhi<sup>3</sup>, Junwei Wu<sup>1\*</sup>, Xinhe Zhang<sup>4</sup>

*1. Department of Materials Science and Engineering, Harbin Institute of Technology Shenzhen Graduate School, Shenzhen Key Laboratory of Advanced Materials, Shenzhen 518055, China.*

*2. Department of Applied Chemistry, Tianjin Polytechnic University, Tianjin 300387, China*

*3. Department of Materials Science and Engineering, Zhejiang University, Hangzhou 310027, China*

*4. Dongguan McNair Technology Co., Ltd, Dongguan City, Guangdong 523700, China*

\*To whom correspondence should be addressed. Fax: 86-755-2603 3504; Phone: 86-755-2603 3290; E-mail: [junwei.wu@hitsz.edu.cn](mailto:junwei.wu@hitsz.edu.cn)

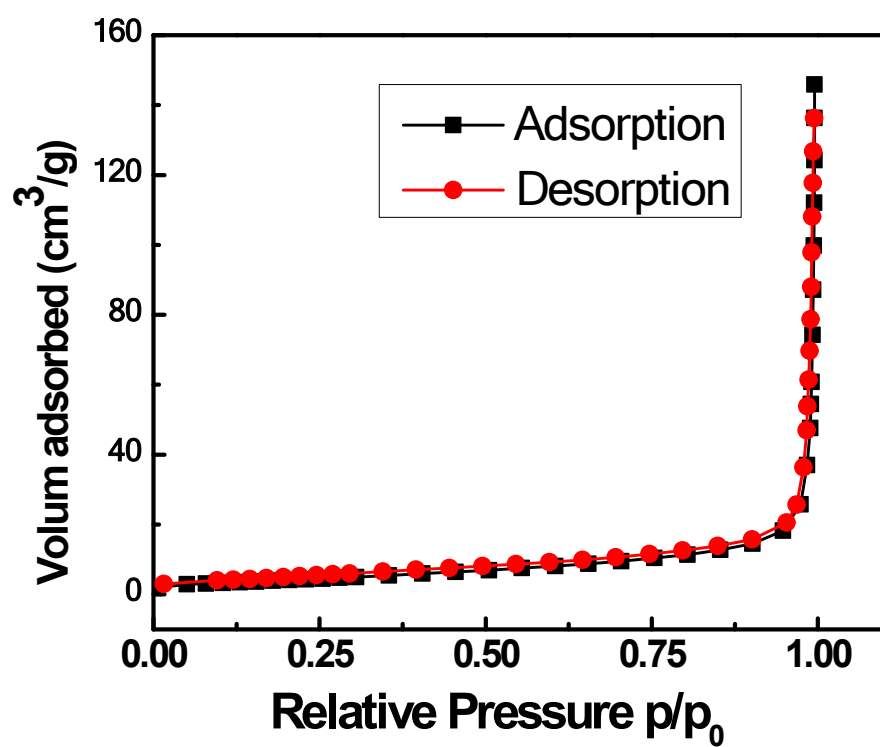

Fig. S1 N<sub>2</sub> adsorption-desorption isotherm of flower-like CoMn<sub>2</sub>O<sub>4</sub> microsphere
